## Connecting muscles to tendons: tendons and musculoskeletal development in flies and vertebrates

Ronen Schweitzer, Elazar Zelzer and Talila Volk

There was an error published in *Development* **137**, 2807-2817.

On p. 2808, StripeB was incorrectly referred to as an epidermal growth factor (Egf)-like, rather than an early growth response (Egr)-like, transcription factor. The corrected sentence appears below.

One of the earliest genes that induce tendon progenitor cells within the ectoderm encodes the early growth response (Egr)-like transcription factor StripeB, one of the two isoforms produced by the *stripe* gene.

We apologise to the authors and readers for this mistake.
